# Supplementary material for: Burden of Crohn’s Disease in East Asia: A 34-Year Analysis with Projections to 2060
Source: Research Square preprint supplement (doi:10.21203/rs.3.rs-8385700/v1), 2026-01-29
Supplement: Supplementary file 1 [file 88543d46e47848abdc1abae5.docx]

**Title : Burden of Crohn’s Disease in East Asia: A 34-Year Analysis with Projections to 2060**

*[International Journal of Colorectal Disease](https://link.springer.com/journal/384)*

**Author and institutional affiliations :**

Tianqi Liuab*, Ruixue Liabc*, Zinan Zhaob, Zi Liangab,Tian Zhangb, Fei Zhaob, Yue Wangb, Wenfeng Xub#, Pengfei Jinb#

*Ruixue Li and Tianqi Liu have contributed equally to this work.

Affiliations:

1. Department of Pharmacy Administration and Clinical Pharmacy School of Pharmaceutical Sciences, Peking University, Beijing 100191, P.R. China.
2. Department of Pharmacy, Beijing Hospital; National Center of Gerontology; Institute of Geriatric Medicine, Chinese Academy of Medical Sciences; Beijing Key Laboratory of Assessment of Clinical Drugs Risk and Individual Application (Beijing Hospital), Beijing 100730, P.R. China;
3. Department of Pharmacy, Xizang Autonomous Region People's Hospital, Xizang 850000, P.R. China;

**# Corresponding author:** Pengfei Jin and Wenfeng Xu

Pengfei Jin

Department of Pharmacy, Beijing Hospital; National Center of Gerontology; Institute of Geriatric Medicine, Chinese Academy of Medical Sciences; Beijing Key Laboratory of Assessment of Clinical Drugs Risk and Individual Application (Beijing Hospital), Beijing 100730, P.R. China

E-mail address: j790101@163.com

Tel: +86-13811300092

Wenfeng Xu

Department of Pharmacy, Beijing Hospital; National Center of Gerontology; Institute of Geriatric Medicine, Chinese Academy of Medical Sciences; Beijing Key Laboratory of Assessment of Clinical Drugs Risk and Individual Application (Beijing Hospital), Beijing 100730, P.R. China

1. mail address: [xuwenfenghill@126.com](mailto:xuwenfenghill@126.com)
   Tel: +86-18311181512

Supplementary Figure S1 Joinpoint regression analysis of the sex-specific trends in ASPR (per 100,000 population), ASMR (per 100,000 population), and ASDR (per 100,000 population) for thyroid disease from 1990 to 2023 in Republic of Korea.


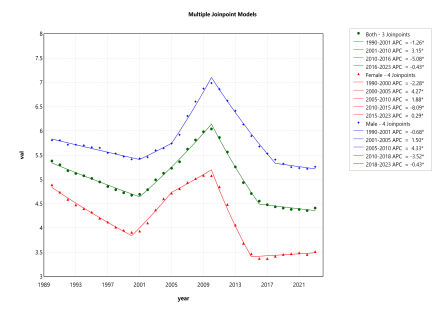

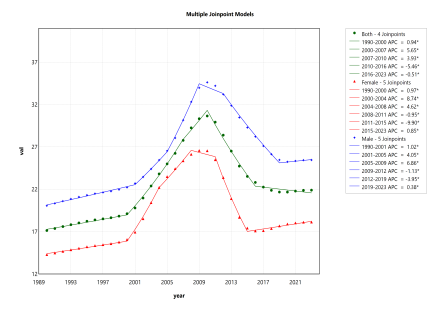

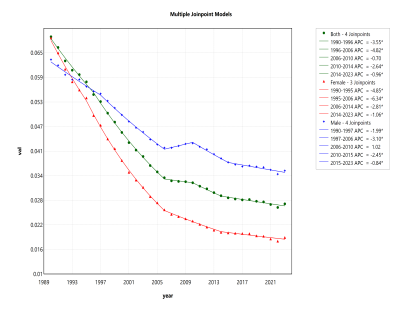

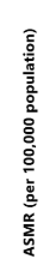

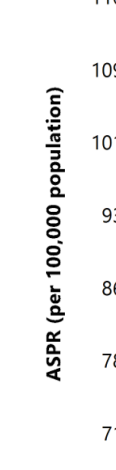

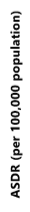


ASPR: age-standardized prevalence rate; ASMR: age-standardized mortality rate; ASDR: age-standardized disability-adjusted life years rate.

Supplementary Figure S2 Joinpoint regression analysis of the sex-specific trends in ASPR (per 100,000 population), ASMR (per 100,000 population), and ASDR (per 100,000 population) for thyroid disease from 1990 to 2023 in Japan.


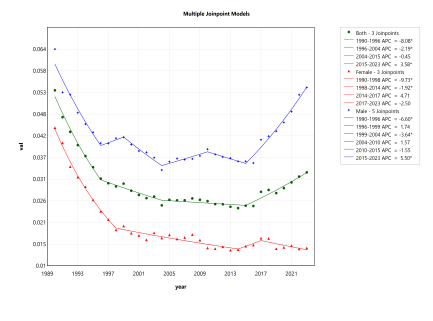

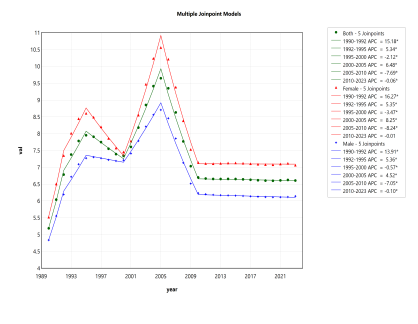

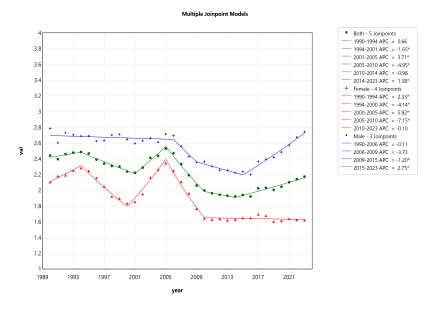

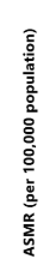

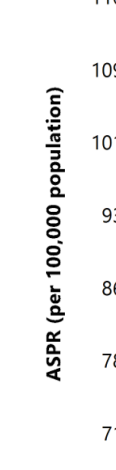

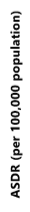


ASPR: age-standardized prevalence rate; ASMR: age-standardized mortality rate; ASDR: age-standardized disability-adjusted life years rate.

Supplementary Figure S3 Joinpoint regression analysis of the sex-specific trends in ASPR (per 100,000 population), ASMR (per 100,000 population), and ASDR (per 100,000 population) for thyroid disease from 1990 to 2023 in China.


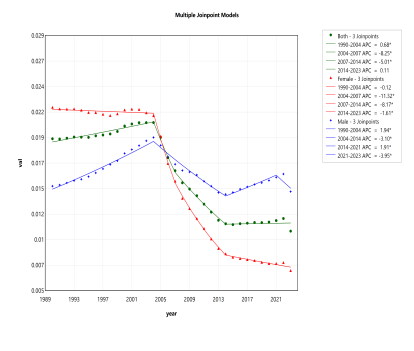

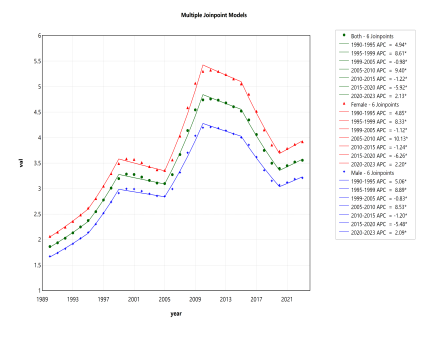

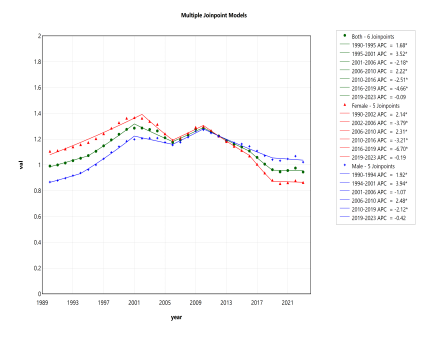

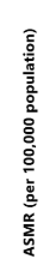

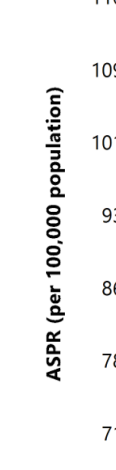

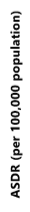


ASPR: age-standardized prevalence rate; ASMR: age-standardized mortality rate; ASDR: age-standardized disability-adjusted life years rate.

Supplementary Table S1 Decomposition analysis of CD burden in China, Japan, and the Republic of Korea

| location | sex | cause | measure | Overll difference | Aging | Population | Epidemiological change |
| --- | --- | --- | --- | --- | --- | --- | --- |
| Republic of Korea | Male | Crohn's disease | Deaths | 1.68(14.5%) | 4.9 (42.35%) | 4.28 (37.03%) | -7.51 (-64.88%) |
| Republic of Korea | Female | Crohn's disease | Deaths | -2.8(-23.15%) | 8.13 (67.28%) | 4.01 (33.18%) | -14.94 (-123.61%) |
| Republic of Korea | Both | Crohn's disease | Deaths | -1.12(-4.74%) | 13.43 (56.76%) | 8.36 (35.35%) | -22.91 (-96.85%) |
| Republic of Korea | Male | Crohn's disease | DALYs (Disability-Adjusted Life Years) | 462.47(35.59%) | 78.77 (6.06%) | 509.56 (39.21%) | -125.85 (-9.68%) |
| Republic of Korea | Female | Crohn's disease | DALYs (Disability-Adjusted Life Years) | 154.93(14.93%) | 122.12 (11.77%) | 363.27 (35%) | -330.46 (-31.84%) |
| Republic of Korea | Both | Crohn's disease | DALYs (Disability-Adjusted Life Years) | 617.4(26.41%) | 194.04 (8.3%) | 870.84 (37.26%) | -447.48 (-19.14%) |
| Republic of Korea | Male | Crohn's disease | Prevalence | 3977.06(86.79%) | 303.65 (6.63%) | 2128.85 (46.46%) | 1544.56 (33.71%) |
| Republic of Korea | Female | Crohn's disease | Prevalence | 2891.56(88.8%) | 326.12 (10.01%) | 1450.22 (44.53%) | 1115.23 (34.25%) |
| Republic of Korea | Both | Crohn's disease | Prevalence | 6868.63(87.62%) | 560.43 (7.15%) | 3564.08 (45.47%) | 2744.13 (35.01%) |
| Japan | Male | Crohn's disease | Deaths | 30.03(74.73%) | 36.25 (90.2%) | 4.41 (10.97%) | -10.62 (-26.44%) |
| Japan | Female | Crohn's disease | Deaths | -5.27(-13.84%) | 45.05 (118.35%) | 4.16 (10.93%) | -54.48 (-143.13%) |
| Japan | Both | Crohn's disease | Deaths | 24.76(31.64%) | 80 (102.24%) | 8.71 (11.13%) | -63.95 (-81.72%) |
| Japan | Male | Crohn's disease | DALYs (Disability-Adjusted Life Years) | 603.36(32.53%) | 380.88 (20.54%) | 166.35 (8.97%) | 56.13 (3.03%) |
| Japan | Female | Crohn's disease | DALYs (Disability-Adjusted Life Years) | 46.22(2.93%) | 458.65 (29.11%) | 156.37 (9.93%) | -568.8 (-36.1%) |
| Japan | Both | Crohn's disease | DALYs (Disability-Adjusted Life Years) | 649.59(18.94%) | 812.91 (23.7%) | 327.81 (9.56%) | -491.13 (-14.32%) |
| Japan | Male | Crohn's disease | Prevalence | 1753.84(52.42%) | 214.27 (6.4%) | 320.4 (9.58%) | 1219.18 (36.44%) |
| Japan | Female | Crohn's disease | Prevalence | 2361.58(58.06%) | 225.71 (5.55%) | 480.06 (11.8%) | 1655.81 (40.71%) |
| Japan | Both | Crohn's disease | Prevalence | 4115.43(55.51%) | 470.9 (6.35%) | 794.79 (10.72%) | 2849.74 (38.44%) |
| China | Male | Crohn's disease | Deaths | 68.56(110.5%) | 40.56 (65.37%) | 27.68 (44.62%) | 0.31 (0.51%) |
| China | Female | Crohn's disease | Deaths | -15.22(-17.57%) | 56.76 (65.53%) | 29.63 (34.21%) | -101.61 (-117.31%) |
| China | Both | Crohn's disease | Deaths | 53.34(35.88%) | 99.73 (67.08%) | 57.59 (38.74%) | -103.97 (-69.94%) |
| China | Male | Crohn's disease | DALYs (Disability-Adjusted Life Years) | 4145.5(96.1%) | 707.69 (16.41%) | 1845.78 (42.79%) | 1592.02 (36.91%) |
| China | Female | Crohn's disease | DALYs (Disability-Adjusted Life Years) | 2203.98(42.85%) | 1105.14 (21.49%) | 2031.95 (39.51%) | -933.1 (-18.14%) |
| China | Both | Crohn's disease | DALYs (Disability-Adjusted Life Years) | 6349.48(67.14%) | 1822.18 (19.27%) | 3875.79 (40.99%) | 651.51 (6.89%) |
| China | Male | Crohn's disease | Prevalence | 18371.9(189.69%) | 1841.04 (19.01%) | 5301.4 (54.74%) | 11229.46 (115.95%) |
| China | Female | Crohn's disease | Prevalence | 22194.68(195.84%) | 2391.93 (21.11%) | 6735.82 (59.44%) | 13066.93 (115.3%) |
| China | Both | Crohn's disease | Prevalence | 40566.58(193.01%) | 4270.36 (20.32%) | 11992.49 (57.06%) | 24303.74 (115.63%) |

Supplementary Figure S4Age-specific numbers and rates (per 100,000 population) of mortality rate number due to CD by gender in 2023. (A) China; (B) Japan; (C) Republic of Korea.


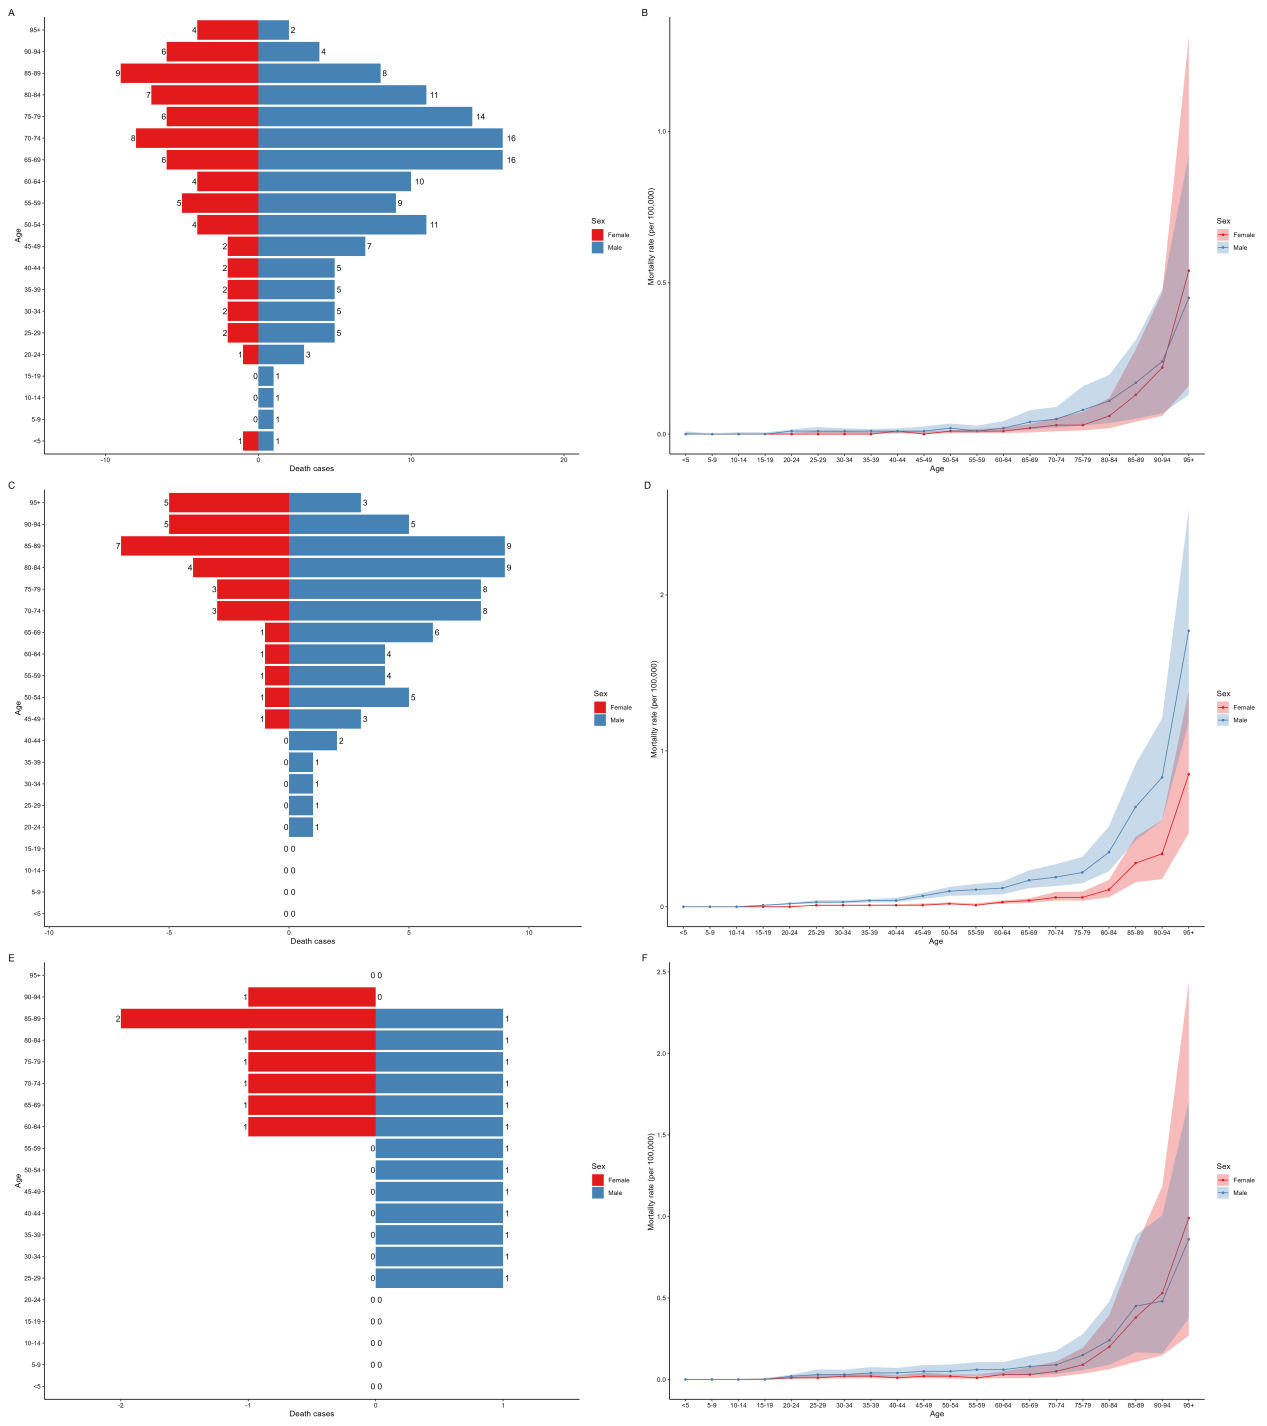


CD: Crohn’s Disease; DALYs: disability-adjusted life years.
